# Supplementary material
Source: PubMed Central journal article supplement (PMC4804353)
Supplement: NIHMS740736-supplement-3.pdf [file NIHMS740736-supplement-3.pdf]

## Supplementary Table 2: Storage requirements of SBT.

|             | <b>SRA (GB)</b> | <b>Fasta.gz (GB)</b> | <b>Sequence Bloom Tree (GB)</b> | <b>Compressed SBT (GB)</b> |
|-------------|-----------------|----------------------|---------------------------------|----------------------------|
| Leaves      | 4966            | 2692                 | 618                             | 63                         |
| Entire Tree | —               | —                    | 1295                            | 200                        |

Supplementary Table 2: Leaves gives the size of the data associated with the leaves. The SRA and Fasta.gz columns give the storage space for the 2652 input sequence files (original download and standard storage) while the other columns give the storage cost of the 2652 leaf filters. Entire Tree gives the total storage cost for the leaves and all internal nodes.

### Supplementary Table 3: Time to build the SBT.

| Stage                             | Time                  | # threads allowed |
|-----------------------------------|-----------------------|-------------------|
| Construction of bloom filters     | $\approx 3$ days      | 20 threads        |
| Building the SBT from filters     | $\approx 20$ hours    | 1 thread          |
| Compression of the filters        | $\approx 14$ hours    | 1 thread          |
| Average total time per experiment | $\approx 2.5$ minutes | -                 |

Supplementary Table 3: Time for each stage of building a the SBT and an average total time to add a new experiment to the SBT.

#### Supplementary Table 4: Average statistics for single query sets.

| Query                         | Time       | Nodes Visited |
|-------------------------------|------------|---------------|
| Known Expressed Transcripts   | 20 minutes | 2663          |
| Known Unexpressed Transcripts | 69 seconds | 41            |
| Random Synthetic Sequences    | 24 seconds | 15            |

Supplementary Table 4: Average time to query and number of nodes visited for 100 queries taken from known expressed transcripts, known unexpressed transcripts, and randomly generated sequences. SBT is excellent at eliminating transcripts which are not in an experiment, while still performing roughly equivalent to the naïve search for genes that are known to be expressed in these tissues at  $TPM \geq 100$ .

**Supplementary Table 5: Tissue-specific expression in the human transcriptome.**

| <b>Threshold (<math>\theta</math>)</b> | <b>Blood</b> | <b>Breast</b> | <b>Brain</b> | <b>Nonspecific</b> |
|----------------------------------------|--------------|---------------|--------------|--------------------|
| 0.9                                    | 1357         | 95            | 202          | 134096             |
| 0.8                                    | 2669         | 275           | 521          | 154748             |
| 0.7                                    | 3747         | 385           | 805          | 166484             |

Supplementary Table 5: Number of transcripts displaying tissue-specific behavior among the full set of human transcripts. Transcripts were considered tissue specific if they were found in  $> 33\%$  of the sequencing runs for a tissue and additionally  $\geq 70\%$  of the runs in which the transcript was found were that tissue. Transcripts that contained zero hits in the SBT were omitted from this table.
